# Supplementary material
Source: PubMed Central journal article supplement (PMC2890730)
Supplement: 1004153107_pnas.201004153SI.pdf [file 1004153107_pnas.201004153SI.pdf]

# Supporting Information

Yoon et al. 10.1073/pnas.1004153107

## SI Materials and Methods

**Expression and Purification of MD-1.** MD-1 was expressed in insect cells by a baculovirus expression system. MD-1 encoding cDNA (residues 21–160 for cMD-1 and residues 20–162 for mMD-1) was amplified by PCR and ligated into a modified pAcGP67 baculovirus transfer vector (BD Biosciences) that contains C-terminal, thrombin cleavage site and His<sub>6</sub> tag. Recombinant baculovirus was obtained by transfecting SF9 insect cells with the cloned plasmid DNA and linearized baculovirus DNA (AB vector). MD-1 protein was expressed for 2 d after infecting Hi-5 insect cells with amplified recombinant virus. Secreted protein was purified by Ni-NTA affinity chromatography and Mono Q anion exchange chromatography. After thrombin digestion, the resulting protein was purified by gel filtration chromatography. MD-1<sup>lipid IVa</sup> was obtained by mixing purified MD-1 protein and synthesized lipid IVa (Peptide International) in a molar ratio of 1:2, and purified from unbound components by a Mono Q column.

**MD-1/LPS Interaction Analysis.** To analyze the MD-1/LPS interaction, native PAGE and gel filtration were used. *Escherichia coli* LPS or its variant LPS Ra (Sigma-Aldrich and List Biological Laboratories) was solubilized by sonication either in water or buffer [20 mM Hepes (pH 7.4), 150 mM NaCl] and incubated with MD-1 for 2–3 h at room temperature. To examine competition of MD-1 with polymyxin B for LPS, MD-1 was incubated with polymyxin B for 2 h before LPS was added. The MD-1/LPS or MD-1/LPS/polymyxin B mixture was loaded onto a native gel, and electrophoresis was performed in running buffer [25 mM Tris, 190 mM glycine (pH 8.8)]. The interaction was also confirmed by gel filtration on a Superdex 200 HR 10/30 column in running buffer [20 mM Hepes (pH 7.4), 150 mM NaCl, 1 mM EDTA].

- Otwinowski Z, Minor W (1997) Processing x-ray diffraction data collected in oscillation mode. *Methods Enzymol* 276:307–326.
- Sheldrick GM (2008) A short history of SHELX. *Acta Crystallogr A* 64:112–122.
- Collaborative Computational Project, Number 4 (1994) The CCP4 suite: Programs for protein crystallography. *Acta Crystallogr D* 50:760–763.
- Cowtan K (1994) 'dm': An automated procedure for phase improvement by density modification. *Joint CCP4 ESF-EACBM Newslett Protein Crystallogr* 31:34–38.

**Crystallization and Data Collection.** cMD-1<sup>PGT</sup> and cMD-1<sup>lipid IVa</sup> were crystallized at 23 °C by sitting-drop, vapor diffusion. cMD-1<sup>PGT</sup> crystals were obtained by mixing 0.5 μL of protein solution (11 mg/mL) with 0.5 μL of well solution containing 18% PEG 4000 and 100 mM Hepes (pH 7.0). cMD-1<sup>lipid IVa</sup> crystals were generated by mixing 0.5 μL of cMD-1/lipid IVa solution (10 mg/mL) with 0.5 μL of well solution containing 17% PEG 2000 and 100 mM Mes (pH 6.0). cMD-1<sup>PGT</sup> crystals were derivatized in 10 mM di-μ-iodo-bis-ethylenediamine-diplatinum (II) nitrate (PIP) for experimental phasing. Crystals were cryoprotected by 25% glycerol. Native and PIP derivative X-ray diffraction data of cMD-1<sup>PGT</sup> were collected at the Stanford Synchrotron Radiation Lightsource (SSRL) beamline 11-1 and at the Advanced Light Source (ALS) beamline 8.2.2., respectively. cMD-1<sup>lipid IVa</sup> diffraction data were collected at the Advance Photon Source (APS) beamline 23ID-B. X-ray data were processed with *HKL2000* (1). Data collection statistics are summarized in [Tables S1](#) and [S2](#).

**Structure Determination and Refinement.** The cMD-1<sup>PGT</sup> structure was determined by SIRAS phasing ([Table S1](#)). Heavy-atom sites were located by *SHELXD* (2), and phases were calculated by *MLPHARE* (3). The resulting phases were density modified by *DM* (4). The initial model was manually built in the density-modified, electron density map using the hMD-2 structure (PDB ID code 2e56) as a template. The cMD-1<sup>PGT</sup> structure was iteratively built using *COOT* (5) and refined with *REFMAC5* (6). The cMD-1<sup>lipid IVa</sup> structure was solved by molecular replacement with *PHASER* (7) using the refined cMD-1<sup>PGT</sup> structure as a search model. The final cMD-1<sup>lipid IVa</sup> structure was obtained by iterative model building and refinement. Refinement statistics are summarized in [Table S2](#).

- Emsley P, Cowtan K (2004) Coot: Model-building tools for molecular graphics. *Acta Crystallogr D Biol Crystallogr* 60:2126–2132.
- Murshudov GN, Vagin AA, Dodson EJ (1997) Refinement of macromolecular structures by the maximum-likelihood method. *Acta Crystallogr D Biol Crystallogr* 53:240–255.
- McCoy AJ, et al. (2007) Phaser crystallographic software. *J Appl Cryst* 40:658–674.

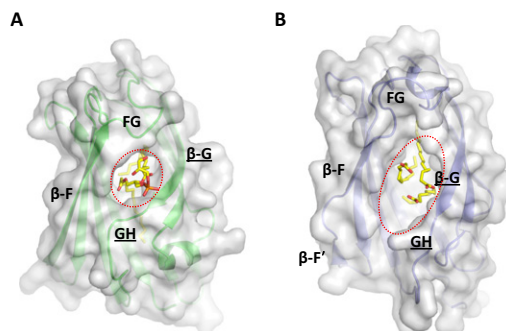

**Fig. S1.** cMD-1 (A) and hMD-2 (B; PDB ID code 2e56) shown with a transparent surface over ribbons. The cavity entrance is highlighted with red broken lines. Molecules found in the hydrophobic cavity are represented by sticks (carbon, yellow; oxygen, red; phosphorus, orange). A PGT molecule was built in the cMD-1 structure compared with three myristoyl acid molecules that were built into the hMD-2 structure.







**Table S1. Data collection and phasing statistics for crystallographic data used to determine the cMD-1<sup>PGT</sup> structure by SIRAS phasing**

|                                     | PIP derivative                                | Native                                        |
|-------------------------------------|-----------------------------------------------|-----------------------------------------------|
| Data collection                     |                                               |                                               |
| Space group                         | P2 <sub>1</sub> 2 <sub>1</sub> 2 <sub>1</sub> | P2 <sub>1</sub> 2 <sub>1</sub> 2 <sub>1</sub> |
| Cell parameters, Å                  | a = 40.21<br>b = 77.06<br>c = 102.37          | a = 39.90<br>b = 76.84<br>c = 102.38          |
| Wavelength, Å                       | 1.0720                                        | 0.9794                                        |
| Resolution, Å                       | 30.00–2.40                                    | 50.00–2.20                                    |
| Highest resolution, Å               | 2.49–2.40                                     | 2.28–2.20                                     |
| No. observations                    | 74,821                                        | 143,981                                       |
| No. unique reflections              | 12,440                                        | 16,458                                        |
| R <sub>merge</sub> (%) <sup>*</sup> | 7.2 (28.2) <sup>†</sup>                       | 9.0 (48.9) <sup>†</sup>                       |
| I/σ                                 | 30.7 (3.8) <sup>†</sup>                       | 34.0 (5.2) <sup>†</sup>                       |
| Completeness (%)                    | 97.0 (81.9) <sup>†</sup>                      | 99.9 (99.8) <sup>†</sup>                      |
| Redundancy                          | 6.0 (3.8) <sup>†</sup>                        | 8.7 (8.2) <sup>†</sup>                        |
| Phasing                             |                                               |                                               |
| Resolution, Å                       | 15.00–3.00                                    |                                               |
| No. Pt (SHELXD)                     | 6                                             |                                               |
| Acentric phasing power              | 1.11                                          |                                               |
| Centric phasing power               | 0.87                                          |                                               |

<sup>\*</sup>R<sub>merge</sub> =  $\sum_{hkl} \sum_i |I_i(hkl) - \langle I(hkl) \rangle| / \sum_{hkl} \sum_i I_i(hkl)$ .

<sup>†</sup>Numbers in parentheses were calculated from data of the highest-resolution shell.

**Table S2. Crystallographic statistics of the cMD-1<sup>PGT</sup> and cMD-1<sup>lipid IVa</sup> structures**

|                                     | cMD-1 <sup>PGT</sup>                                | cMD-1 <sup>lipid IVa</sup>                    |
|-------------------------------------|-----------------------------------------------------|-----------------------------------------------|
| Data collection                     |                                                     |                                               |
| Space group                         | P2 <sub>1</sub> 2 <sub>1</sub> 2 <sub>1</sub>       | P2 <sub>1</sub> 2 <sub>1</sub> 2 <sub>1</sub> |
| Cell parameters, Å                  | a = 40.12<br>b = 76.49<br>c = 101.94                | a = 39.47<br>b = 78.15<br>c = 101.24          |
| Wavelength, Å                       | 0.9795                                              | 1.0333                                        |
| Resolution, Å                       | 30.00–2.00                                          | 20.00–2.40                                    |
| Highest resolution, Å               | 2.07–2.00                                           | 2.49–2.40                                     |
| No. observations                    | 147,581                                             | 53,788                                        |
| No. unique reflections              | 21,878                                              | 12,503                                        |
| R <sub>merge</sub> (%) <sup>*</sup> | 7.7 (49.7) <sup>†</sup>                             | 9.1 (37.1) <sup>†</sup>                       |
| I/σ                                 | 36.1 (4.7) <sup>†</sup>                             | 28.0 (6.6) <sup>†</sup>                       |
| Completeness (%)                    | 99.4 (97.3) <sup>†</sup>                            | 98.2 (97.6) <sup>†</sup>                      |
| Redundancy                          | 6.8 (5.8) <sup>†</sup>                              | 4.4 (4.3) <sup>†</sup>                        |
| Refinement                          |                                                     |                                               |
| Resolution, Å                       | 30–2.00                                             | 20–2.40                                       |
| No. of reflections, total           | 20,652                                              | 11,843                                        |
| No. of reflections, test            | 1,095                                               | 612                                           |
| R <sub>cryst</sub> (%) <sup>‡</sup> | 22.1                                                | 23.2                                          |
| R <sub>free</sub> (%) <sup>§</sup>  | 25.2                                                | 26.7                                          |
| Average B value, Å <sup>2</sup>     | 37.0                                                | 32.1                                          |
| No. protein atoms                   | 2,153                                               | 2,181                                         |
| No. water molecules                 | 146                                                 | 95                                            |
| No. ligand atoms                    | 94 (PGT)<br>6 (glycerol)<br>10 (triethylene glycol) | 186 (lipid IVa)<br>18 (glycerol)              |
| Rmsd bonds, Å                       | 0.017                                               | 0.017                                         |
| Rmsd angles, °                      | 1.72                                                | 1.69                                          |
| Ramachandran, <sup>§</sup> favored  | 96.7%                                               | 96.4%                                         |
| Ramachandran, <sup>§</sup> outliers | 0.0%                                                | 0.4%                                          |

<sup>\*</sup>R<sub>merge</sub> =  $\sum_{hkl} \sum_i |I_i(hkl) - \langle I(hkl) \rangle| / \sum_{hkl} \sum_i I_i(hkl)$ .

<sup>†</sup>Numbers in parentheses were calculated from data of the highest-resolution shell.

<sup>‡</sup>R<sub>cryst</sub> =  $\sum |F_{obs} - F_{calc}| / \sum F_{obs}$  where F<sub>calc</sub> and F<sub>obs</sub> are the calculated and observed structure factor amplitudes, respectively.

<sup>§</sup>R<sub>free</sub> = as for R<sub>cryst</sub>, but for 5% of the total reflections chosen at random and omitted from refinement.

<sup>§</sup>Calculated using MolProbity (<http://molprobity.biochem.duke.edu/>).
